# Supplementary material
Source: PubMed Central journal article supplement (PMC6626568)
Supplement: NIHMS1028117-supplement-supp_info.pdf [file NIHMS1028117-supplement-supp_info.pdf]

# 1 **Supporting Information**

## 2 **Relaxometry Results**

3  $T_1$  was  $1628 \pm 69$  ms in unfixed white matter ( $n = 14$ ),  $1391 \pm 83$  ms after 1 day of fixation (a  
4  $14.6 \pm 2.2\%$  decrease), and  $1338 \pm 52$  ms after 31 days of fixation (a  $17.8 \pm 1.8\%$  decrease).  $T_2$   
5 was  $63.35 \pm 5.68$  ms in unfixed white matter,  $47.42 \pm 4.44$  ms after 1 day of fixation (a  $24.8 \pm$   
6  $8.4\%$  decrease), and  $48.62 \pm 4.34$  ms after 31 days of fixation (a  $22.8 \pm 9.0\%$  decrease).  $T_1$  was  
7  $1734 \pm 67$  ms in unfixed gray matter ( $n = 7$ ),  $1504 \pm 162$  ms after 1 day of fixation (a  $13.4 \pm$   
8  $6.9\%$  decrease), and  $1531 \pm 171$  ms after 31 days of fixation (an  $11.9 \pm 7.6\%$  decrease).  $T_2$  was  
9  $76.80 \pm 14.31$  ms in unfixed gray matter,  $73.70 \pm 12.89$  ms after 1 day of fixation (a  $3.48 \pm$   
10  $7.28\%$  decrease), and  $79.18 \pm 12.30$  ms after 31 days of fixation (a  $3.99 \pm 7.95\%$  increase).

## 11 **Supporting Information Tables and Figures**

12 Axial maps of the static ( $B_0$ ) and radiofrequency ( $B_1$ ) magnetic fields in qMT and MWI scanning  
13 sessions are plotted in Supporting Information Figure S1. Measurements of  $F$ , MWF, and  
14 reference-normalized  $D_2O$ -exchanged ZTE intensity within the ROIs are tabulated before  
15 (Supporting Information Table S1) and after (Supporting Information Table S2) correction for  
16 tissue shrinkage. Exploratory comparisons of shrinkage-corrected measurements before and  
17 after fixation are given in Supporting Information Table S3, and shrinkage-corrected  
18 measurements are plotted in Supporting Information Figure S2.

19 **Supporting Information Figures**

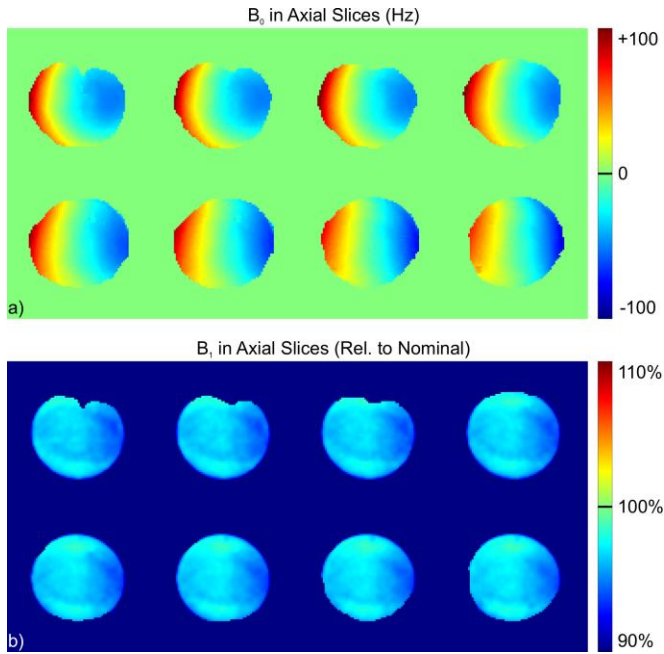

20  
21 Supporting Information Figure S1: Axial maps of the static ( $B_0$ ) (a) and radiofrequency ( $B_1$ ) (b)  
22 magnetic fields in qMT and MWI scanning sessions, averaged across specimens and timepoints  
23 ( $n = 21$ ) and masked using the union of the spinal cord masks from each of the 21 imaging  
24 sessions.  $B_0$  field maps were acquired after the iterative shimming process converged on stable  
25 calculated shim currents.

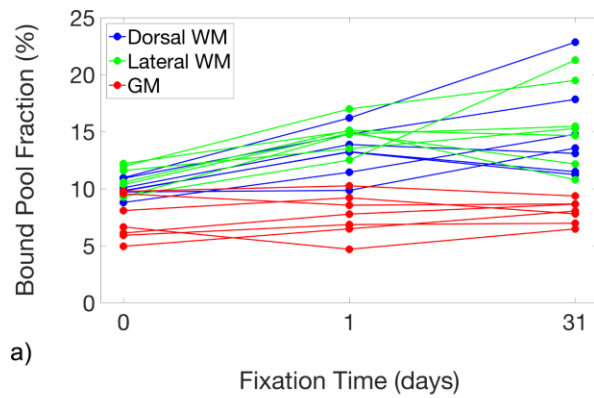

a)

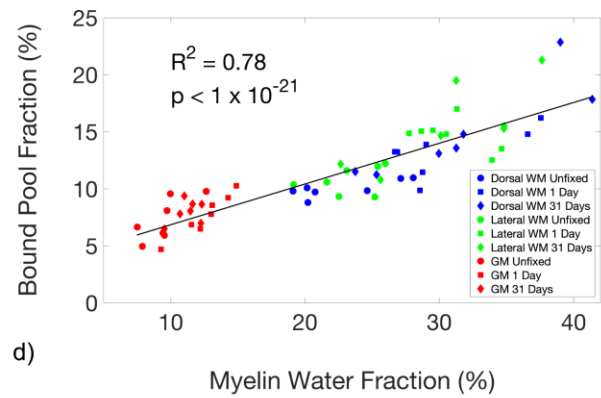

d)

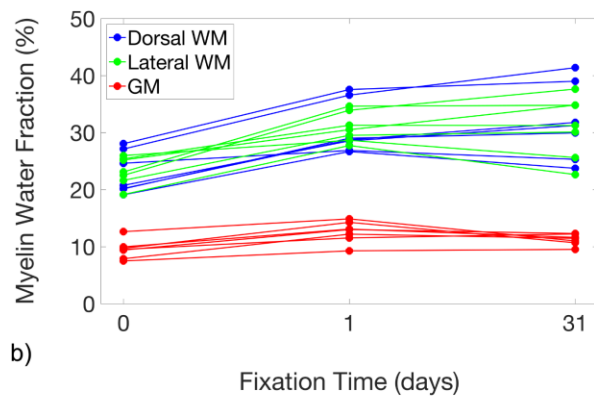

b)

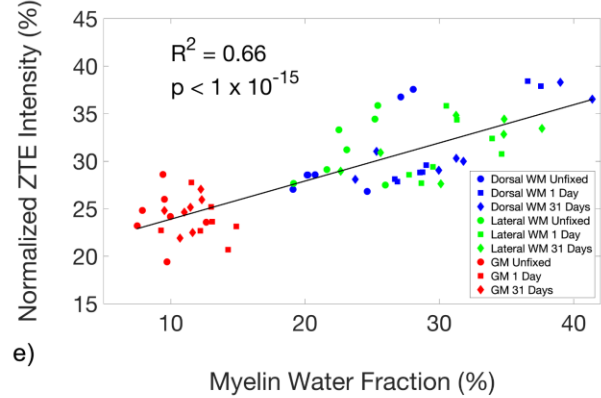

e)

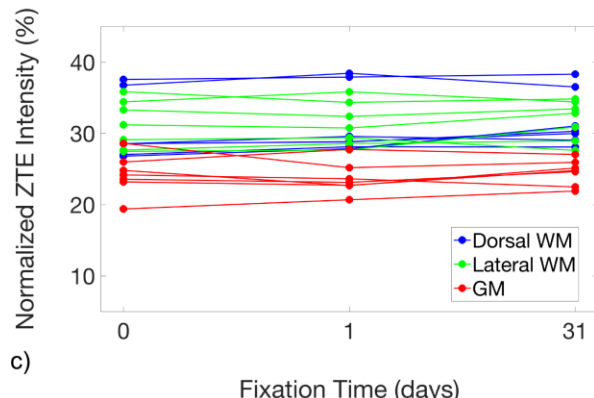

c)

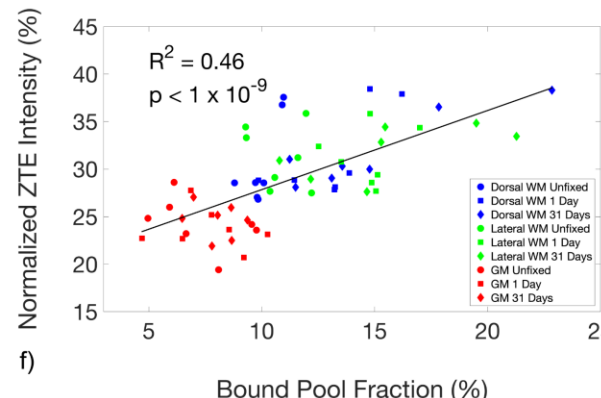

f)

26

27 Supporting Information Figure S2: Line plots showing the changes in the quantitative  
 28 magnetization transfer bound pool fraction (a), myelin water fraction (b), and reference-  
 29 normalized D<sub>2</sub>O-exchanged ZTE signal intensity (c), of unfixed specimens and after 1 day and  
 30 31 days of fixation, after correcting for tissue shrinkage due to fixation. Shrinkage correction  
 31 removes a large amount of the observed increase in D<sub>2</sub>O-exchanged ZTE intensity, but the  
 32 inter-measurement correlations (d-f) are not significantly altered.

### 33 Supporting Information Table S1

| Bound Pool Fraction |             |              |              |              |              |              |              |              |              |
|---------------------|-------------|--------------|--------------|--------------|--------------|--------------|--------------|--------------|--------------|
| ROI                 | Time (days) | Specimen 2.1 | Specimen 3.1 | Specimen 3.3 | Specimen 4.1 | Specimen 4.3 | Specimen 5.1 | Specimen 5.3 | Mean ± SD    |
| Dorsal WM           | 0           | 9.84         | 10.97        | 10.91        | 9.72         | 8.8          | 10.09        | 9.8          | 10.02 ± 0.75 |
|                     | 1           | 14.01        | 16.07        | 14.86        | 10.35        | 12.26        | 14.66        | 14.11        | 13.76 ± 1.89 |
|                     | 31          | 13.18        | 23.58        | 16.79        | 13.84        | 14.65        | 13.22        | 13.93        | 15.60 ± 3.73 |
| Lateral WM          | 0           | 12.21        | 11.96        | 9.29         | 11.6         | 9.32         | 10.58        | 10.37        | 10.76 ± 1.20 |
|                     | 1           | 15.96        | 16.86        | 14.87        | 14.19        | 13.40        | 15.98        | 15.83        | 15.30 ± 1.20 |
|                     | 31          | 12.66        | 20.13        | 14.56        | 15.60        | 21.10        | 14.80        | 14.75        | 16.23 ± 3.14 |
| GM                  | 0           | 9.77         | 6.12         | 5.92         | 6.65         | 4.96         | 9.56         | 8.09         | 7.30 ± 1.87  |
|                     | 1           | 10.87        | 7.71         | 6.89         | 4.93         | 6.95         | 9.04         | 9.80         | 8.03 ± 2.02  |
|                     | 31          | 10.99        | 8.93         | 6.57         | 6.61         | 7.98         | 8.75         | 9.45         | 8.47 ± 1.58  |

| Myelin Water Fraction |             |              |              |              |              |              |              |              |              |
|-----------------------|-------------|--------------|--------------|--------------|--------------|--------------|--------------|--------------|--------------|
| ROI                   | Time (days) | Specimen 2.1 | Specimen 3.1 | Specimen 3.3 | Specimen 4.1 | Specimen 4.3 | Specimen 5.1 | Specimen 5.3 | Mean ± SD    |
| Dorsal WM             | 0           | 24.63        | 28.06        | 27.13        | 20.75        | 20.21        | 20.15        | 19.11        | 22.86 ± 3.68 |
|                       | 1           | 28.49        | 37.24        | 36.76        | 29.96        | 30.78        | 30.66        | 28.41        | 31.76 ± 3.70 |
|                       | 31          | 29.70        | 40.26        | 38.95        | 31.89        | 31.52        | 30.24        | 28.77        | 33.05 ± 4.62 |
| Lateral WM            | 0           | 25.98        | 25.41        | 25.2         | 23.11        | 22.52        | 21.63        | 19.15        | 23.29 ± 2.49 |
|                       | 1           | 30.38        | 31.04        | 30.67        | 36.34        | 36.32        | 31.20        | 29.53        | 32.21 ± 2.86 |
|                       | 31          | 30.07        | 32.25        | 32.78        | 35.50        | 37.32        | 30.39        | 27.45        | 32.25 ± 3.36 |
| GM                    | 0           | 12.64        | 9.42         | 9.53         | 7.5          | 7.89         | 9.97         | 9.72         | 9.52 ± 1.67  |
|                       | 1           | 15.77        | 12.90        | 11.60        | 9.74         | 13.06        | 13.83        | 15.19        | 13.16 ± 2.07 |
|                       | 31          | 12.92        | 12.71        | 11.52        | 9.72         | 11.37        | 11.74        | 12.96        | 11.85 ± 1.16 |

| ZTE Intensity |             |              |              |              |              |              |              |              |              |
|---------------|-------------|--------------|--------------|--------------|--------------|--------------|--------------|--------------|--------------|
| ROI           | Time (days) | Specimen 2.2 | Specimen 3.2 | Specimen 3.4 | Specimen 4.2 | Specimen 4.4 | Specimen 5.2 | Specimen 5.4 | Mean ± SD    |
| Dorsal WM     | 0           | 26.81        | 37.56        | 36.76        | 28.57        | 28.55        | 28.55        | 27.03        | 30.55 ± 4.58 |
|               | 1           | 27.77        | 39.41        | 39.03        | 29.89        | 29.74        | 30.69        | 28.42        | 32.14 ± 4.94 |
|               | 31          | 32.47        | 41.19        | 38.68        | 31.87        | 31.41        | 30.41        | 28.93        | 33.57 ± 4.55 |
| Lateral WM    | 0           | 27.48        | 35.86        | 34.42        | 31.2         | 33.3         | 29.11        | 27.66        | 31.29 ± 3.35 |
|               | 1           | 27.60        | 35.71        | 36.39        | 31.92        | 33.39        | 30.50        | 28.88        | 32.06 ± 3.32 |
|               | 31          | 32.34        | 37.45        | 36.45        | 34.54        | 35.03        | 28.91        | 29.81        | 33.50 ± 3.26 |
| GM            | 0           | 23.57        | 28.6         | 25.99        | 23.2         | 24.81        | 24.18        | 19.4         | 24.25 ± 2.81 |
|               | 1           | 23.06        | 26.19        | 28.19        | 23.57        | 23.39        | 24.52        | 20.91        | 24.26 ± 2.35 |
|               | 31          | 25.78        | 27.89        | 28.64        | 26.09        | 26.33        | 23.54        | 22.57        | 25.83 ± 2.17 |

34 Supporting Information Table S1: Measurements of F, MWF, and reference-normalized D<sub>2</sub>O-  
 35 exchanged ZTE intensity without correction for tissue shrinkage. All values are in percent units.

36 **Supporting Information Table S2**

| <b>Bound Pool Fraction (Corrected for Tissue Shrinkage)</b> |            |              |              |              |              |              |              |              |              |
|-------------------------------------------------------------|------------|--------------|--------------|--------------|--------------|--------------|--------------|--------------|--------------|
| ROI                                                         | Time (day) | Specimen 2.1 | Specimen 3.1 | Specimen 3.3 | Specimen 4.1 | Specimen 4.3 | Specimen 5.1 | Specimen 5.3 | Mean ± SD    |
| Dorsal WM                                                   | 0          | 9.84         | 10.97        | 10.91        | 9.72         | 8.8          | 10.09        | 9.8          | 10.02 ± 0.75 |
|                                                             | 1          | 13.22        | 16.21        | 14.79        | 9.86         | 11.45        | 13.88        | 13.25        | 13.24 ± 2.09 |
|                                                             | 31         | 11.24        | 22.85        | 17.84        | 13.57        | 14.78        | 13.10        | 11.50        | 14.98 ± 4.12 |
| Lateral WM                                                  | 0          | 12.21        | 11.96        | 9.29         | 11.6         | 9.32         | 10.58        | 10.37        | 10.76 ± 1.20 |
|                                                             | 1          | 15.06        | 17.00        | 14.80        | 13.52        | 12.52        | 15.13        | 14.87        | 14.70 ± 1.40 |
|                                                             | 31         | 10.79        | 19.50        | 15.47        | 15.29        | 21.28        | 14.66        | 12.17        | 15.60 ± 3.73 |
| GM                                                          | 0          | 9.77         | 6.12         | 5.92         | 6.65         | 4.96         | 9.56         | 8.09         | 7.30 ± 1.87  |
|                                                             | 1          | 10.26        | 7.78         | 6.86         | 4.70         | 6.49         | 8.56         | 9.21         | 7.69 ± 1.86  |
|                                                             | 31         | 9.37         | 8.65         | 6.98         | 6.48         | 8.05         | 8.67         | 7.80         | 8.00 ± 1.01  |

| <b>Myelin Water Fraction (Corrected for Tissue Shrinkage)</b> |            |              |              |              |              |              |              |              |              |
|---------------------------------------------------------------|------------|--------------|--------------|--------------|--------------|--------------|--------------|--------------|--------------|
| ROI                                                           | Time (day) | Specimen 2.1 | Specimen 3.1 | Specimen 3.3 | Specimen 4.1 | Specimen 4.3 | Specimen 5.1 | Specimen 5.3 | Mean ± SD    |
| Dorsal WM                                                     | 0          | 24.63        | 28.06        | 27.13        | 20.75        | 20.21        | 20.15        | 19.11        | 22.86 ± 3.68 |
|                                                               | 1          | 26.88        | 37.56        | 36.58        | 28.56        | 28.75        | 29.02        | 26.69        | 30.58 ± 4.54 |
|                                                               | 31         | 25.32        | 39.01        | 41.39        | 31.26        | 31.79        | 29.96        | 23.74        | 31.78 ± 6.51 |
| Lateral WM                                                    | 0          | 25.98        | 25.41        | 25.2         | 23.11        | 22.52        | 21.63        | 19.15        | 23.29 ± 2.45 |
|                                                               | 1          | 28.66        | 31.30        | 30.52        | 34.64        | 33.93        | 29.53        | 27.74        | 30.90 ± 2.59 |
|                                                               | 31         | 25.63        | 31.25        | 34.83        | 34.80        | 37.64        | 30.11        | 22.65        | 30.99 ± 5.36 |
| GM                                                            | 0          | 12.64        | 9.42         | 9.53         | 7.5          | 7.89         | 9.97         | 9.72         | 9.52 ± 1.67  |
|                                                               | 1          | 14.88        | 13.01        | 11.54        | 9.28         | 12.20        | 13.09        | 14.27        | 12.61 ± 1.86 |
|                                                               | 31         | 11.01        | 12.31        | 12.24        | 9.53         | 11.47        | 11.63        | 10.69        | 11.27 ± 0.97 |

| <b>ZTE Intensity (Corrected for Tissue Shrinkage)</b> |            |              |              |              |              |              |              |              |              |
|-------------------------------------------------------|------------|--------------|--------------|--------------|--------------|--------------|--------------|--------------|--------------|
| ROI                                                   | Time (day) | Specimen 2.2 | Specimen 3.2 | Specimen 3.4 | Specimen 4.2 | Specimen 4.4 | Specimen 5.2 | Specimen 5.4 | Mean ± SD    |
| Dorsal WM                                             | 0          | 26.81        | 37.56        | 36.76        | 28.57        | 28.55        | 28.55        | 27.03        | 30.55 ± 4.58 |
|                                                       | 1          | 27.85        | 37.90        | 38.43        | 28.81        | 28.84        | 29.58        | 28.12        | 31.36 ± 4.68 |
|                                                       | 31         | 31.03        | 38.30        | 36.52        | 30.30        | 29.99        | 29.05        | 28.09        | 31.90 ± 3.92 |
| Lateral WM                                            | 0          | 27.48        | 35.86        | 34.42        | 31.2         | 33.3         | 29.11        | 27.66        | 31.29 ± 3.35 |
|                                                       | 1          | 27.68        | 34.35        | 35.83        | 30.76        | 32.38        | 29.40        | 28.57        | 31.28 ± 3.04 |
|                                                       | 31         | 30.90        | 34.83        | 34.42        | 32.83        | 33.44        | 27.62        | 28.94        | 31.86 ± 2.78 |
| GM                                                    | 0          | 23.57        | 28.6         | 25.99        | 23.2         | 24.81        | 24.18        | 19.4         | 24.25 ± 2.81 |
|                                                       | 1          | 23.13        | 25.19        | 27.76        | 22.72        | 22.68        | 23.63        | 20.69        | 23.69 ± 2.24 |
|                                                       | 31         | 24.63        | 25.94        | 27.04        | 24.80        | 25.14        | 22.49        | 21.91        | 24.56 ± 1.82 |

37 Supporting Information Table S2: Measurements of F, MWF, and reference-normalized D<sub>2</sub>O-  
38 exchanged ZTE intensity after correction for tissue shrinkage. All values are in percent units.

39 **Supporting Information Table S3**

| <b>Bound Pool Fraction (Corrected for Tissue Shrinkage)</b> |                                             |                                             |                                             |
|-------------------------------------------------------------|---------------------------------------------|---------------------------------------------|---------------------------------------------|
|                                                             | 0 days vs. 1 day                            | 1 day vs. 31 days                           | 0 days vs. 31 days                          |
| Dorsal WM                                                   | <i>31.7 ± 14.4% (p = 2x10<sup>-3</sup>)</i> | <i>13.5 ± 24.2% (p = 2x10<sup>-1</sup>)</i> | <i>48.7 ± 33.6% (p = 1x10<sup>-2</sup>)</i> |
| Lateral WM                                                  | <i>37.4 ± 14.2% (p = 2x10<sup>-4</sup>)</i> | <i>7.54 ± 31.8% (p = 6x10<sup>-1</sup>)</i> | <i>47.7 ± 44.5% (p = 2x10<sup>-2</sup>)</i> |
| GM                                                          | <i>7.53 ± 21.3% (p = 5x10<sup>-1</sup>)</i> | <i>7.48 ± 18.5% (p = 5x10<sup>-1</sup>)</i> | <i>14.6 ± 27.5% (p = 3x10<sup>-1</sup>)</i> |
| All                                                         | <i>25.6 ± 20.9% (p = 2x10<sup>-5</sup>)</i> | <i>9.49 ± 14.3% (p = 2x10<sup>-1</sup>)</i> | <i>37.0 ± 37.7% (p = 4x10<sup>-4</sup>)</i> |

| <b>Myelin Water Fraction (Corrected for Tissue Shrinkage)</b> |                                             |                                              |                                             |
|---------------------------------------------------------------|---------------------------------------------|----------------------------------------------|---------------------------------------------|
|                                                               | 0 days vs. 1 day                            | 1 day vs. 31 days                            | 0 days vs. 31 days                          |
| Dorsal WM                                                     | <i>34.5 ± 11.8% (p = 2x10<sup>-4</sup>)</i> | <i>3.35 ± 8.91% (p = 3x10<sup>-1</sup>)</i>  | <i>39.3 ± 19.5% (p = 2x10<sup>-3</sup>)</i> |
| Lateral WM                                                    | <i>33.8 ± 15.8% (p = 8x10<sup>-4</sup>)</i> | <i>-0.23 ± 11.3% (p = 9x10<sup>-1</sup>)</i> | <i>33.6 ± 22.5% (p = 8x10<sup>-3</sup>)</i> |
| GM                                                            | <i>33.4 ± 13.8% (p = 3x10<sup>-4</sup>)</i> | <i>-9.26 ± 12.5% (p = 9x10<sup>-2</sup>)</i> | <i>20.8 ± 18.6% (p = 4x10<sup>-2</sup>)</i> |
| All                                                           | <i>33.9 ± 13.2% (p = 3x10<sup>-8</sup>)</i> | <i>-2.05 ± 11.8% (p = 1)</i>                 | <i>31.2 ± 20.8% (p = 2x10<sup>-5</sup>)</i> |

| <b>ZTE Intensity (Corrected for Tissue Shrinkage)</b> |                                              |                                             |                                             |
|-------------------------------------------------------|----------------------------------------------|---------------------------------------------|---------------------------------------------|
|                                                       | 0 days vs. 1 day                             | 1 day vs. 31 days                           | 0 days vs. 31 days                          |
| Dorsal WM                                             | <i>2.69 ± 1.68% (p = 7x10<sup>-3</sup>)</i>  | <i>2.10 ± 5.33% (p = 4x10<sup>-1</sup>)</i> | <i>4.83 ± 5.30% (p = 5x10<sup>-2</sup>)</i> |
| Lateral WM                                            | <i>0.11 ± 3.07% (p = 1)</i>                  | <i>2.05 ± 6.03% (p = 4x10<sup>-1</sup>)</i> | <i>2.11 ± 5.89% (p = 4x10<sup>-1</sup>)</i> |
| GM                                                    | <i>-1.90 ± 7.00% (p = 4x10<sup>-1</sup>)</i> | <i>4.00 ± 5.86% (p = 1x10<sup>-1</sup>)</i> | <i>1.92 ± 7.79% (p = 7x10<sup>-1</sup>)</i> |
| All                                                   | <i>0.30 ± 4.70% (p = 8x10<sup>-1</sup>)</i>  | <i>2.72 ± 5.53% (p = 6x10<sup>-2</sup>)</i> | <i>2.95 ± 6.24% (p = 5x10<sup>-2</sup>)</i> |

40 Supporting Information Table S3: Changes in myelin density measurements between imaging  
 41 time points, after correction for tissue shrinkage, expressed as percent change relative to the  
 42 pre-fixation measurement, with p-values. Although these statistical tests are exploratory, not  
 43 confirmatory, changes with p-values greater than 1.28x10<sup>-3</sup> are displayed in gray italic text.
